# Supplementary material for: Influence of surface charge and protein intermediary layer on the formation of biomimetic calcium phosphate on silica nanoparticles
Source: Royal Society of Chemistry journal article supplement (doi:10.1039/c2jm31733h), 2012-01-01
Supplement: c2jm31733h.pdf [file c2jm31733h.pdf]

| Protein   | Mol. Wt (KDa) | Source   | Peptide Repeat                                                       | Structure                          | Dimensions                             | Net Charge at Various pH's* |            |     |
|-----------|---------------|----------|----------------------------------------------------------------------|------------------------------------|----------------------------------------|-----------------------------|------------|-----|
|           |               |          |                                                                      |                                    |                                        | 4.5                         | 7.4        | 8.0 |
| Collagen  | 300           | Bovine   | <i>Gly-Pro-AA<sup>§</sup></i><br>or<br><i>Gly-AA<sup>§</sup>-Hyp</i> | Triple helix                       | <i>l</i> = 300 nm<br><i>w</i> = 1.5 nm | +                           | Slightly + | ~0  |
| Phosvitin | 34            | Egg Yolk | See Ref 16, 17                                                       | $\alpha$ -Helix and $\beta$ -sheet | 4-6 nm particles                       | -                           | -          | -   |

\* The changes to charge of the protein as function of pH are provided in Figures 1C and 1D.  
<sup>§</sup> Amino acid
